# Supplementary material for: A purified membrane protein from Akkermansia muciniphila or the pasteurised bacterium blunts colitis associated tumourigenesis by modulation of CD8 + T cells in mice
Source: HighWire-hosted journal article supplement (doi:10.1136/gutjnl-2019-320105), 2020-03-13

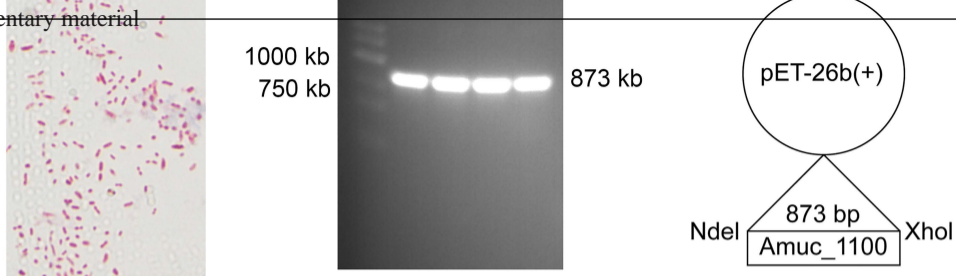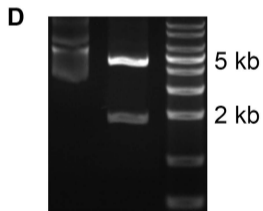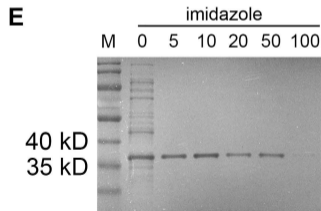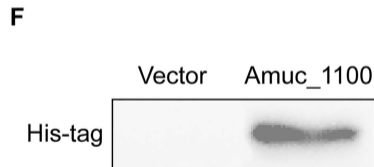

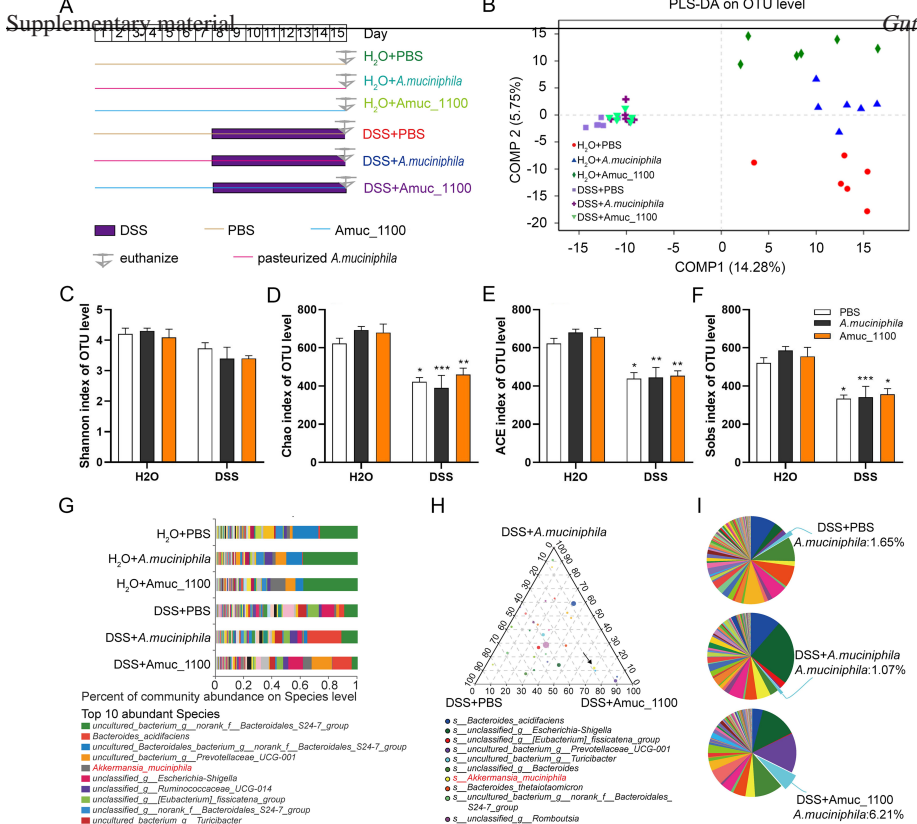

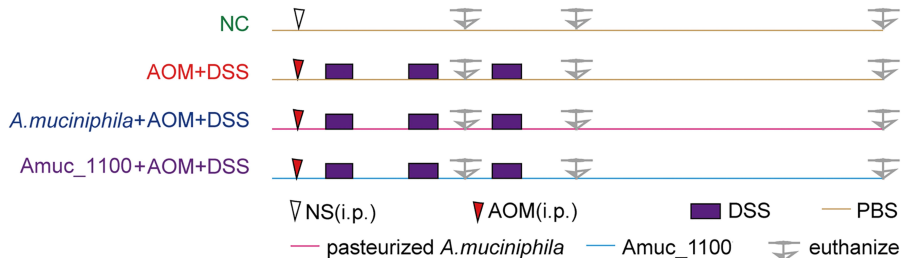

**B**

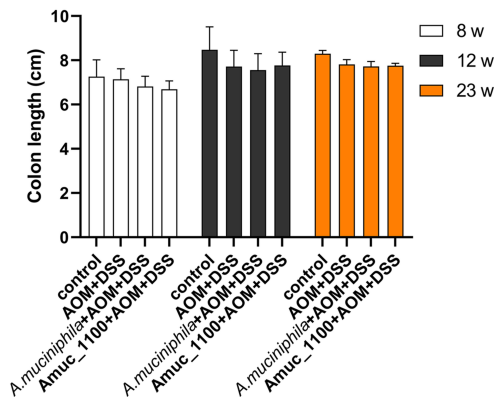

**C**

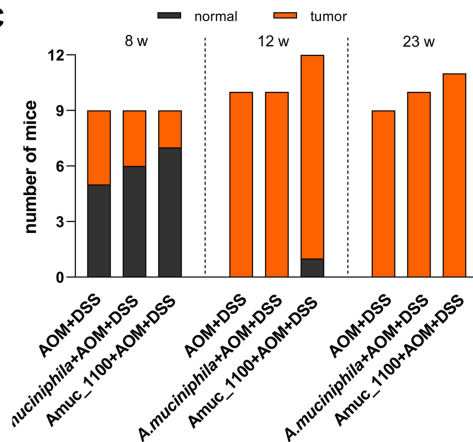

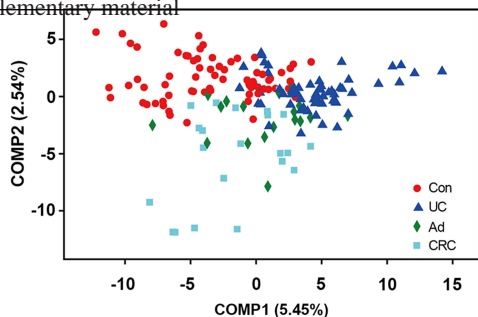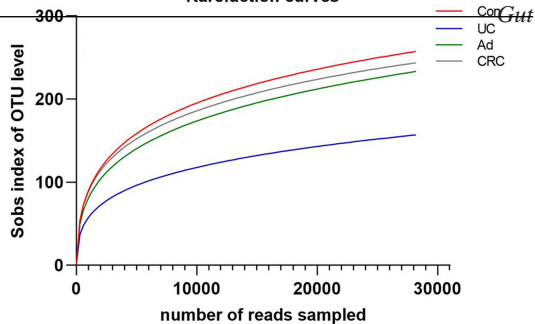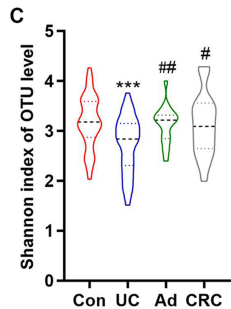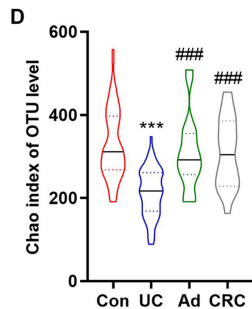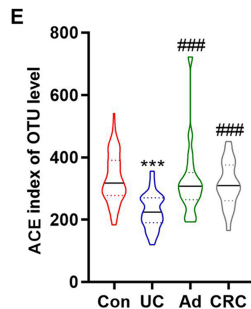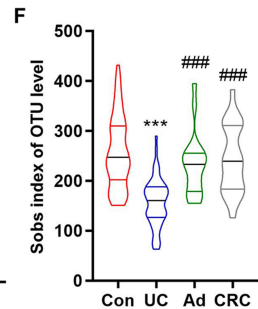

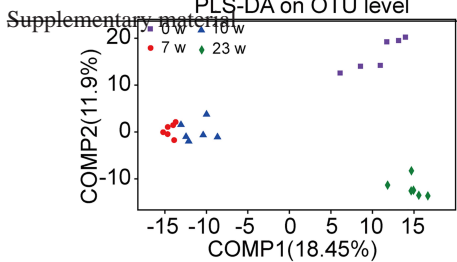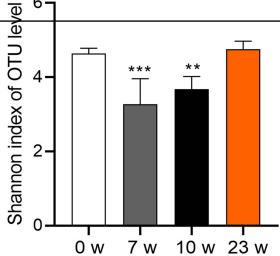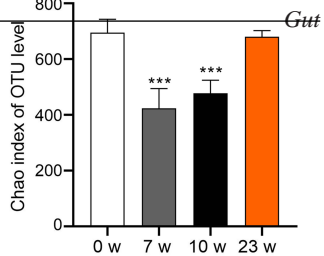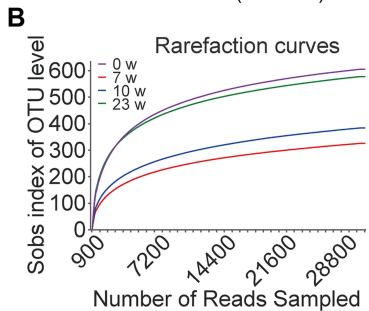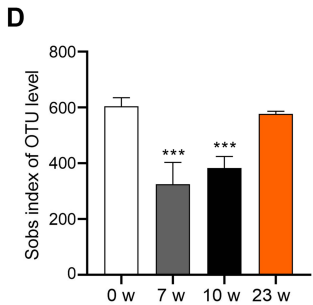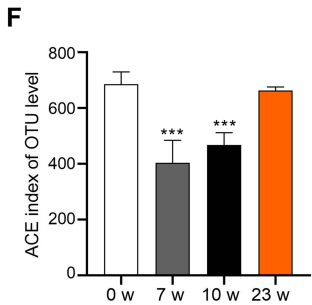

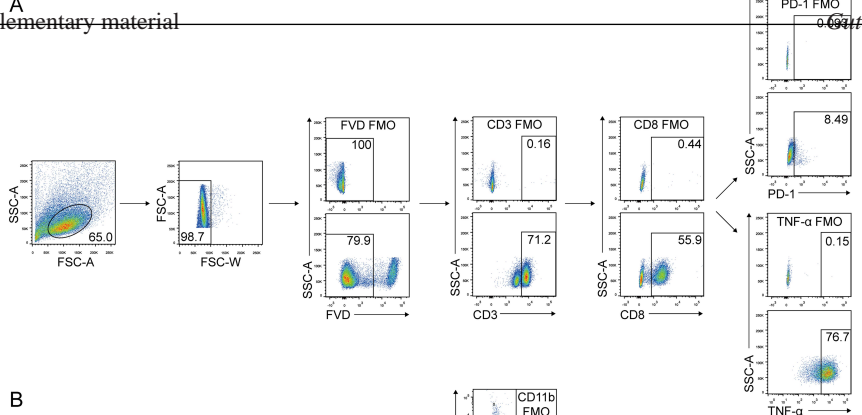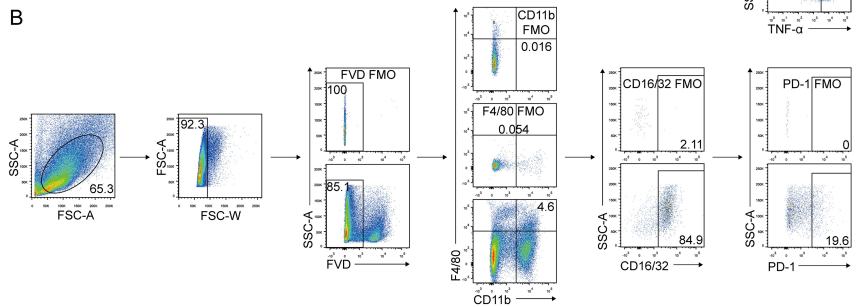

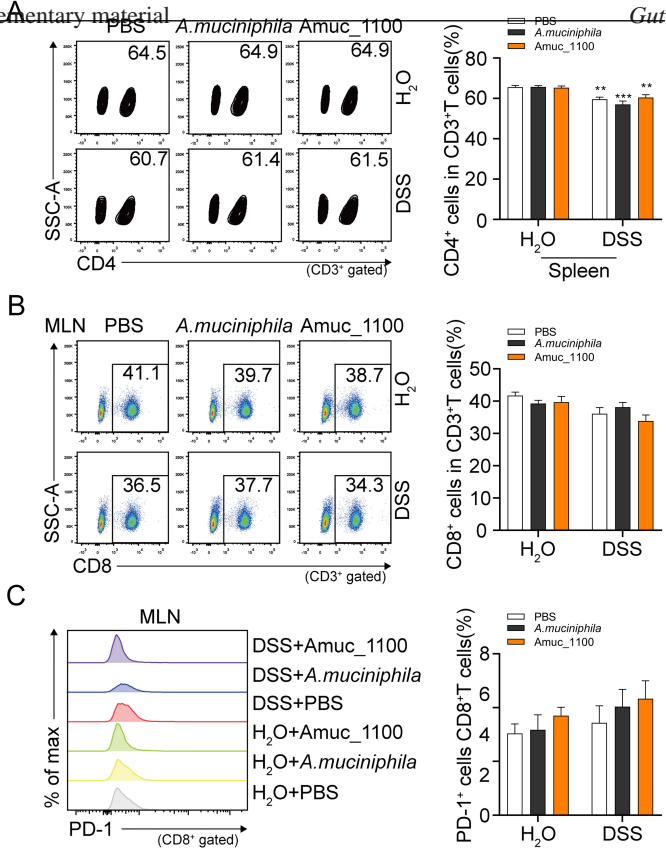

**A**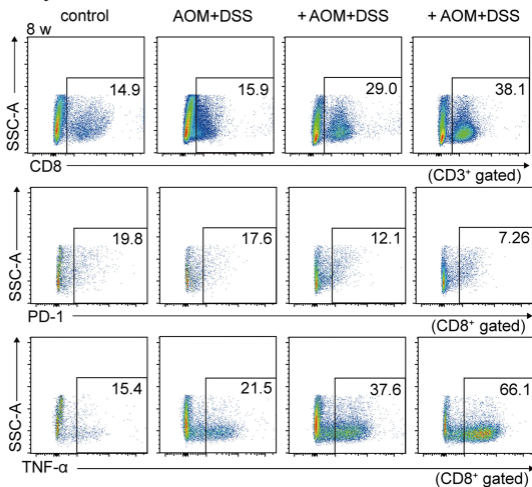**B**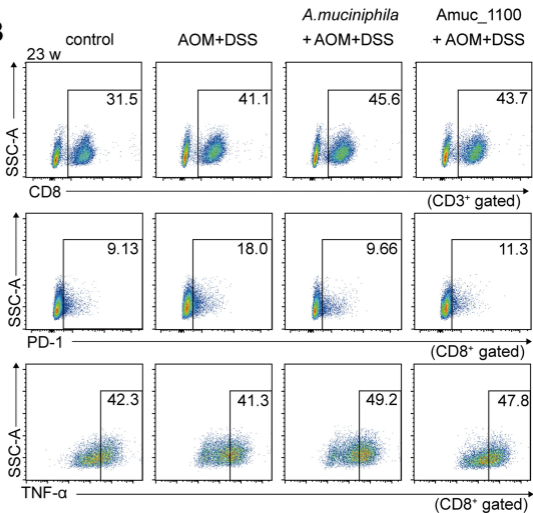



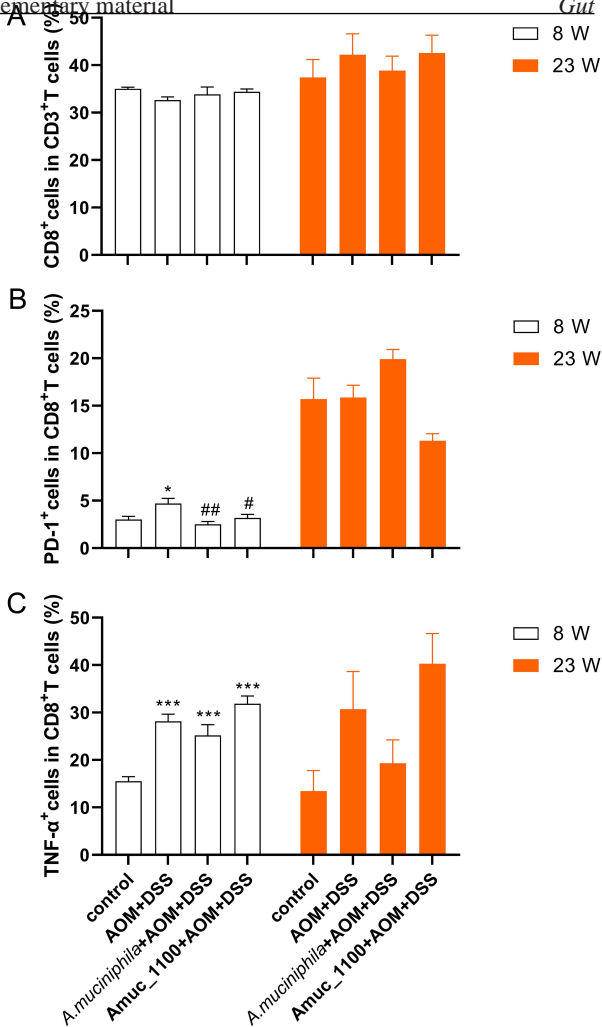

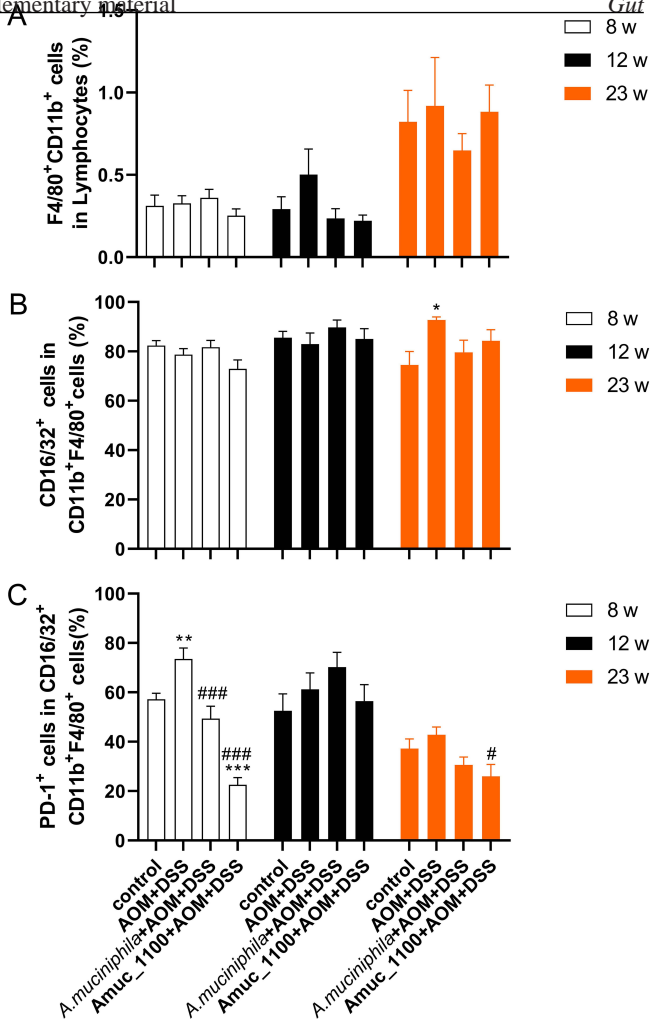

Supplement: gutjnl-2019-320105supp001_data_supplement.pdf [file gutjnl-2019-320105supp001_data_supplement.pdf]
