# Supplementary material for: A purified membrane protein from Akkermansia muciniphila or the pasteurised bacterium blunts colitis associated tumourigenesis by modulation of CD8 + T cells in mice
Source: HighWire-hosted journal article supplement (doi:10.1136/gutjnl-2019-320105), 2020-03-13
Supplement: gutjnl-2019-320105supp002_data_supplement.pdf [file gutjnl-2019-320105supp002_data_supplement.pdf]

1     **A purified membrane protein from *Akkermansia muciniphila* or the pasteurized**  
2     **bacterium blunts colitis associated tumourigenesis by modulation of CD8<sup>+</sup> T cells**  
3                                                             **in mice**

4

5     Lijuan Wang, Lei Tang, Yiming Feng, Suying Zhao, Mei Han, Chuan Zhang, Gehui

6                     Yuan, Jun Zhu, Shuyuan Cao, Qian Wu, Lei Li, Zhan Zhang

7

8

9                                                             **Supplementary data**

10 **MATERIALS AND METHODS**

11 **Western blotting**

12 Amuc\_1100 was a protein of 32 kDa, which was one of the most abundant outer  
13 membrane proteins encoded by a specific Type IV pili gene cluster in *A.muciniphila*.  
14 To test this protein, we added a His tag to the c-terminal of Amuc\_1100. The purified  
15 Amuc\_1100 with the His tag could be detected with a His-tag antibody. An equal  
16 amount of protein was subjected to 10% sodium dodecyl sulfate-polyacrylamide gel  
17 electrophoresis and transferred onto polyvinylidene difluoride membranes. The  
18 membranes were stained with a primary antibody toward the His tag (A100186-100,  
19 GenScript) and then incubated with secondary antibody. Protein bands were visualized  
20 by a gel imaging system (Bio-Rad).

21 **Figure legends**

22 Supplementary Figure 1. Expression and purification of Amuc\_1100 *in vitro*. (A)  
23 Representative Gram-staining of *A. muciniphila*. (B) The coding sequence of  
24 Amuc\_1100 amplified by PCR. (C) His-tagged Amuc\_1100 was cloned into the pET-  
25 26b(+) vector using restriction endonuclease sites (NdeI/XhoI). (D) The recombinant  
26 plasmids were transformed into BL21 *E. coli*. Plasmid digested by MluI and XhoI were  
27 analysed by 1% agarose gel electrophoresis. (E) The purified Amuc\_1100 protein was  
28 stained by Coomassie brilliant blue. His-tagged Amuc\_1100 was eluted with different  
29 concentrations of imidazole. (F) The purified Amuc\_1100 was detected by Western  
30 blotting.

31

32 Supplementary Figure 2. Effects of pasteurized *A. muciniphila* or Amuc\_1100 on the  
33 faecal microbiota in colitis mice. (A) Schematic diagram of the experimental study  
34 design. (B) PLS-DA plot of the faecal microbiota colitis of mice treated with *A.*  
35 *muciniphila* or Amuc\_1100. The Shannon (C), Chao (D), Ace (E) and Sobs (F)  
36 indices on the OUT level were analysed. (G) Relative abundance of bacterial species.  
37 (H) Ternary plots of the relative abundances of species in colitis mice. (I) Pie chart of  
38 the faecal microbiota composition on the species level. Data are presented as the  
39 means± SEM and were analyzed ordinary one-way ANOVA with Tukey's multiple  
40 comparisons. \* $P < 0.05$ , \*\* $P < 0.01$ , \*\*\* $P < 0.001$ , compared with respective control.

41

42 Supplementary Figure 3. Supplementation with pasteurized *A. muciniphila* or

43 Amuc\_1100 suppressed carcinogenesis in mice. (A) Schematic diagram of colitis  
44 associated colon cancer (CAC) model induced by AOM/DSS in mice. (B) The colon  
45 length at the 8<sup>th</sup>, 12<sup>th</sup> and 23<sup>rd</sup> week. (C) Tumour incidence.

46

47 Supplementary Figure 4. The microbial composition in control, ulcerative colitis  
48 (UC), adenoma (Ad) and CRC patients. (A) Partial least squares discriminant analysis  
49 (PLS-DA) plot of the faecal microbiota. (B) Rarefaction curves were used to evaluate  
50 the microbial richness of human faeces. (C) Shannon, (D) Chao, (E) ACE and (F)  
51 Sobs indices were analysed on OUT level in human. Sobs, Chao and Ace indices  
52 reflect community richness, and the Shannon index represents community diversity.  
53 Data are presented as the means± SEM and analyzed by ordinary one-way ANOVA  
54 with Tukey's multiple comparisons. \*\*\* $P < 0.001$ , compared with control; # $P < 0.05$ ,  
55 ## $P < 0.01$ , ### $P < 0.001$ , compared with UC.

56

57 Supplementary Figure 5. The microbial composition of mice with CAC. (A) PLS-DA  
58 plot of the faecal microbiota. (B) Rarefaction curves of the microbial richness in mice.  
59 (C) Shannon, (D) Sobs, (E) Chao and (F) ACE indices on the OUT level were  
60 analyzed. Sobs, Chao and Ace indices reflect community richness, and the Shannon  
61 index represents community diversity. Data are presented as the means± SEM and  
62 were analysed by ordinary one-way ANOVA Tukey's multiple comparisons. \*\* $P <$   
63 0.01, \*\*\* $P < 0.001$ , compared with 0 w.

64

65 Supplementary Figure 6. FCM gating strategies. (A) Gating strategy for the analysis  
66 of the percentage of CD8<sup>+</sup> T cells in CD3<sup>+</sup> T cells and PD-1<sup>+</sup> or TNF- $\alpha$ <sup>+</sup> cells in CD8<sup>+</sup>  
67 T cells. (B) Gating strategy for the analysis of the percentage of CD11b<sup>+</sup> F4/80<sup>+</sup> cells  
68 in lymphocytes, CD16/32<sup>+</sup> cells in CD11b<sup>+</sup> F4/80<sup>+</sup> cells and PD-1<sup>+</sup> cells in CD16/32<sup>+</sup>  
69 CD11b<sup>+</sup> F4/80<sup>+</sup> cells.

70

71 Supplementary Figure 7. Effects of *A. muciniphila* or Amuc\_1100 on T cells in colitis  
72 mice. (A) The percentage of CD4<sup>+</sup> T cells in CD3<sup>+</sup> T cells in the spleen. (B) The  
73 fraction of CD8<sup>+</sup> T cells in CD3<sup>+</sup> T cells and (C) the expression of PD-1 in CD8<sup>+</sup> T  
74 cells in the mesenteric lymph node (MLN). Data are presented as the means $\pm$  SEM  
75 and were analysed by ordinary one-way ANOVA with Tukey's multiple comparisons.  
76 \*\* $P < 0.01$ , \*\*\* $P < 0.001$ , compared with respective control.

77

78 Supplementary Figure 8. *A. muciniphila* or Amuc\_1100 enhanced CTLs activation in  
79 CAC mice. FCM analysis of CTLs, PD-1<sup>+</sup> CTLs and TNF- $\alpha$  CTLs in the MLN in the  
80 8<sup>th</sup> (A) and 23<sup>rd</sup> week (B).

81

82 Supplementary Figure 9. Effects of pasteurized *A. muciniphila* or Amuc\_1100 on  
83 CD8<sup>+</sup>T cells in the spleens of CAC mice. (A) The percentage of CD8<sup>+</sup> T cells at 8<sup>th</sup>  
84 and 23<sup>rd</sup> week. (B) The fraction of TNF- $\alpha$ <sup>+</sup> cells in CD8<sup>+</sup>T cells at 8<sup>th</sup> and 23<sup>rd</sup> week.  
85 (C) The fraction of PD-1<sup>+</sup> cells in CD8<sup>+</sup>T cells at 8<sup>th</sup> and 23<sup>rd</sup> week. Data are  
86 presented as the means $\pm$  SEM and were analysed with ordinary one-way ANOVA

87 with Tukey's multiple comparisons. \* $P < 0.05$ , \*\* $P < 0.01$ , \*\*\* $P < 0.001$ , compared  
88 with control; # $P < 0.05$ , ## $P < 0.01$ , compared with AOM+DSS group.  
89  
90 Supplementary Figure 10. Effects of pasteurized *A. muciniphila* or Amuc\_1100 on  
91 macrophages in the MLN of CAC mice. (A) The percentage of macrophage  
92 (CD11b<sup>+</sup>F4/80<sup>+</sup>) cells in the 8<sup>th</sup>, 12<sup>th</sup> and 23<sup>rd</sup> week. (B) The expression of CD16/32 in  
93 macrophages. (C) The expression of PD-1 in macrophages. Data are presented as the  
94 means ± SEM and were analyzed with ordinary one-way ANOVA with Tukey's  
95 multiple comparisons. \* $P < 0.05$ , \*\* $P < 0.01$ , \*\*\* $P < 0.001$ , compared with control;  
96 # $P < 0.05$ , ### $P < 0.001$ , compared with AOM+DSS group.

Supplementary Table 1. Patients Characteristic

|                               | Control<br>(n=72) | ulcerative colitis<br>(n=58) | adenomatous polyps<br>(n=18) | colorectal cancer<br>(n=22) |
|-------------------------------|-------------------|------------------------------|------------------------------|-----------------------------|
| Gender, male/female           | 36/36             | 31/27                        | 13/5                         | 17/5                        |
| Age (year)                    | 44.75±17.7        | 42.8±14.9                    | 62.6±9.1                     | 64.3±10.1                   |
| Smoking                       | 13.9%             | 5.2%                         | 22.2%                        | 40.9%                       |
| Glucose (mmol/L) <sup>a</sup> | 4.95±0.72         | 4.32±0.65                    | 4.95±0.72                    | 5.37±1.33                   |
| TG (mmol/L) <sup>a</sup>      | 1.58±1.21         | 1.22±0.69                    | 1.95±1.03                    | 1.38±0.21                   |

<sup>a</sup>, Mean±SEM

Supplementary Table 2. Scoring system for disease activity index

| score | Body weight loss | stool consistency | bleeding         |
|-------|------------------|-------------------|------------------|
| 0     | none             | none              | none             |
| 1     | 0-5%             | ---               | trace            |
| 2     | 5-10%            | loose stool       | mild hemocult    |
| 3     | 10-20%           | ---               | obvious hemocult |
| 4     | >20%             | diarrhea          | gross bleeding   |



Supplementary Table 3. Specific primers sequences

| Gene Name             | Primer sequence                |                                |
|-----------------------|--------------------------------|--------------------------------|
|                       | Forward                        | Reverse                        |
| <i>A. muciniphila</i> | AGAGGTCTCAAGCGTTGTTTCGGAA      | TTTCGCTCCCCTGGCCTTCGTGC        |
| Amuc_1100             | GGGTACCATATGATCGTCAATTCCAAACGC | CCTTGGCTCGAGATCTTCAGACGGTTCCTG |
| EUB                   | AGAGTTTGATCCTGGCTC             | TGCTGCCTCCCGTAGGAGT            |
| 16S rRNA              | GTGCCAGCMGCCGCGGTAA            | GGACTACHVGGGTWTCTAAT           |
| Mus-TNF- $\alpha$     | CCCTCACACTCACAAACCAC           | ACAAGGTACAACCCATCGGC           |
| Mus-IL-6              | GAGGATACCACTCCCAACAGACC        | AAGTGCATCATCGTTGTTTCATACA      |
| Mus-IL-18             | GTTTACAAGCATCCAGGCACAGC        | GGTTTGAGGCGGCTTTCTTTG          |
| Mus-IFN- $\gamma$     | GCGCCAAGCATTCAATGAGC           | ATCTCTTCCCCACCCCGAAT           |
| Mus-IL-1 $\beta$      | GCCACCTTTTGACAGTGATGAG         | ATGTGCTGCTGCGAGATTTG           |
| Mus-IL-33             | AAGTACAGCATTCAAGACCAGC         | TTATTTTGCAAGGCGGGACC           |
| Mus-Caspase-3         | TCTGACTGGAAAGCCGAAACT          | AGGGACTGGATGAACCACGAC          |
| Mus-Bcl-2             | ATGATAACCGGGAGATCGTG           | G TTCAGGTACTCAGTCACC           |

Mus-GAPDH

AGGTCGGTGTGAACGGATTTG

TGTAGACCATGTAGTTGAGGTCA

---

Supplementary Table 4. Antibodies

| Antibodies                        | Use            | Source                   | Identifier |
|-----------------------------------|----------------|--------------------------|------------|
| CD3 PerCP-eFluor 710              | Flow Cytometry | eBioscience              | 46-0032-80 |
| CD16/32-PerCP-Cy5.5               | Flow Cytometry | eBioscience              | 45-0161-80 |
| FcR Block                         | Flow Cytometry | eBioscience              | 14-0161-86 |
| Fixable Viability Dye eFlour™ 780 | Flow Cytometry | eBioscience              | 65-0865    |
| CD279 (PD-1)-BV421                | Flow Cytometry | BD Biosciences           | 562584     |
| CD4-FITC                          | Flow Cytometry | BD Biosciences           | 553046     |
| CD8a-FITC                         | Flow Cytometry | BD Biosciences           | 553030     |
| CD11b-FITC                        | Flow Cytometry | BD Biosciences           | 557396     |
| F4/80-PE                          | Flow Cytometry | BD Biosciences           | 565410     |
| TNF-PE                            | Flow Cytometry | BD Biosciences           | 561063     |
| Annexin V/PI                      | Flow Cytometry | BD Biosciences           | 556547     |
| CD8 (IHC)                         | IHC            | Abcam                    | ab108343   |
| F4/80 (IHC)                       | IHC            | Santa Cruz Biotechnology | sc-377009  |

---

|                   |     |                           |             |
|-------------------|-----|---------------------------|-------------|
| Cleaved-caspase 3 | IHC | Cell Signaling Technology | 9664        |
| $\gamma$ H2AX     | IHC | Cell Signaling Technology | 7631        |
| Ki67              | IHC | Cell Signaling Technology | 9449        |
| His-tag           | WB  | GenScript                 | A100186-100 |

---
